# Supplementary material for: Cutoff Values for Diagnosing Hepatic Steatosis Using Contemporary MRI-Proton Density Fat Fraction Measuring Methods
Source: PubMed Central journal article supplement — Korean J Radiol. 2022 Nov 3;23(12):1260–8. doi: 10.3348/kjr.2022.0334 (PMC9747271; doi:10.3348/kjr.2022.0334), 2022-11-03
Supplement: kjr-23-1260-s001.pdf [file kjr-23-1260-s001.pdf]

## SUPPLEMENT

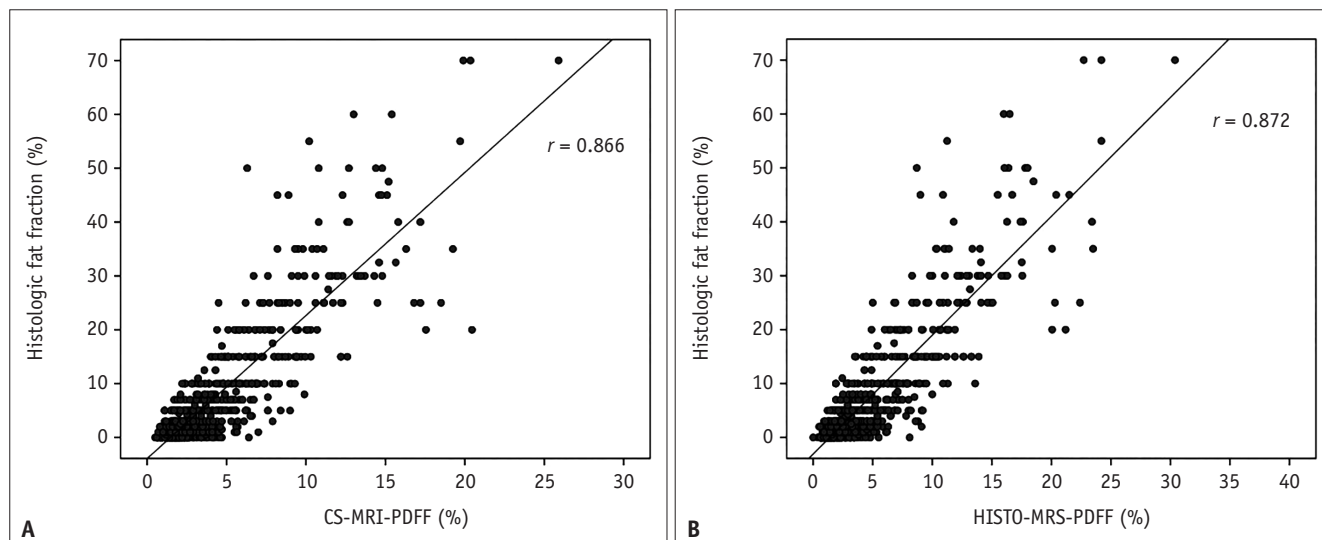

**Supplementary Fig. 1. Scatterplots of the relationship (Pearson's correlation coefficient,  $r$ ) between histologic fat fraction and CS-MRI PDFF (A) and HISTO-MRS-PDFF (B).** Strong and significant correlations were observed between the histologic fat fraction and CS-MRI PDFF ( $r = 0.866$ ;  $p < 0.001$ ) and HISTO-MRS PDFF ( $r = 0.872$ ;  $p < 0.001$ ). CS-MRI-PDFF = chemical-shift-imaging-based MRI-proton density fat fraction, HISTO-MRS-PDFF = high-speed T2-corrected multi-echo MR spectroscopy proton density fat fraction
